# Supplementary material for: A Heterozygous Mutation in Cardiac Troponin T Promotes Ca2+ Dysregulation and Adult Cardiomyopathy in Zebrafish
Source: MDPI journal article supplement (doi:10.3390/jcdd8040046), 2021-04-20
Supplement: s1 [file s1]

## Supplementary information

### A. Sequencing primers

| Primer name  | Sequence                 | Size (bp) |
|--------------|--------------------------|-----------|
| Tnnt2a_ZF_Fw | CCGTTTGCTTTGTGGGTTTTGTCA | 301       |
| Tnnt2a_ZF_Rv | TGTTTTCGCGAATTTACCCCACTG | 301       |

### B. sgRNA

| Oligo name        | Sequence               |
|-------------------|------------------------|
| Tnnt2a_ZF_Oligo 1 | TAGGTCCTTCTCCATGCGCTTA |

**Supplementary Figure 1: Sequences for primers and oligonucleotides used in this study. (A)** Sequences of PCR primers used for sequencing. **(B)** Sequence of sgRNAs used for targeting of the Cas9 nuclease to the specific site(s) of mutation(s).

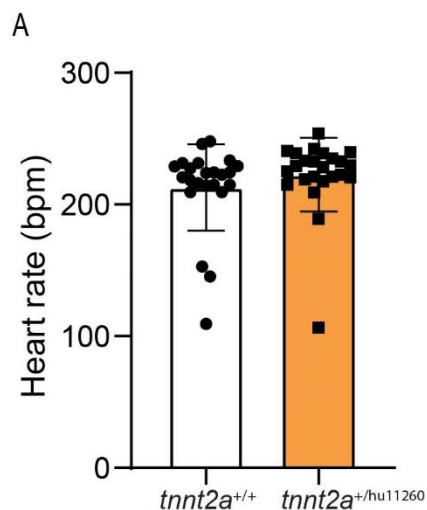

**Supplementary Figure 2. Heart rate from a brightfield high-speed video imaging of *tnnt2a*<sup>+/hu11260</sup> at 5 dpf. (A)** Bar graph of heart rate for *tnnt2a*<sup>+/+</sup> and *tnnt2a*<sup>+/hu11260</sup>. Statistics: mean ± SEM, n.s.  $p > 0.05$ , *tnnt2a*<sup>+/+</sup>  $n = 23$ , *tnnt2a*<sup>+/hu11260</sup>  $n = 24$ , unpaired Students t-test.

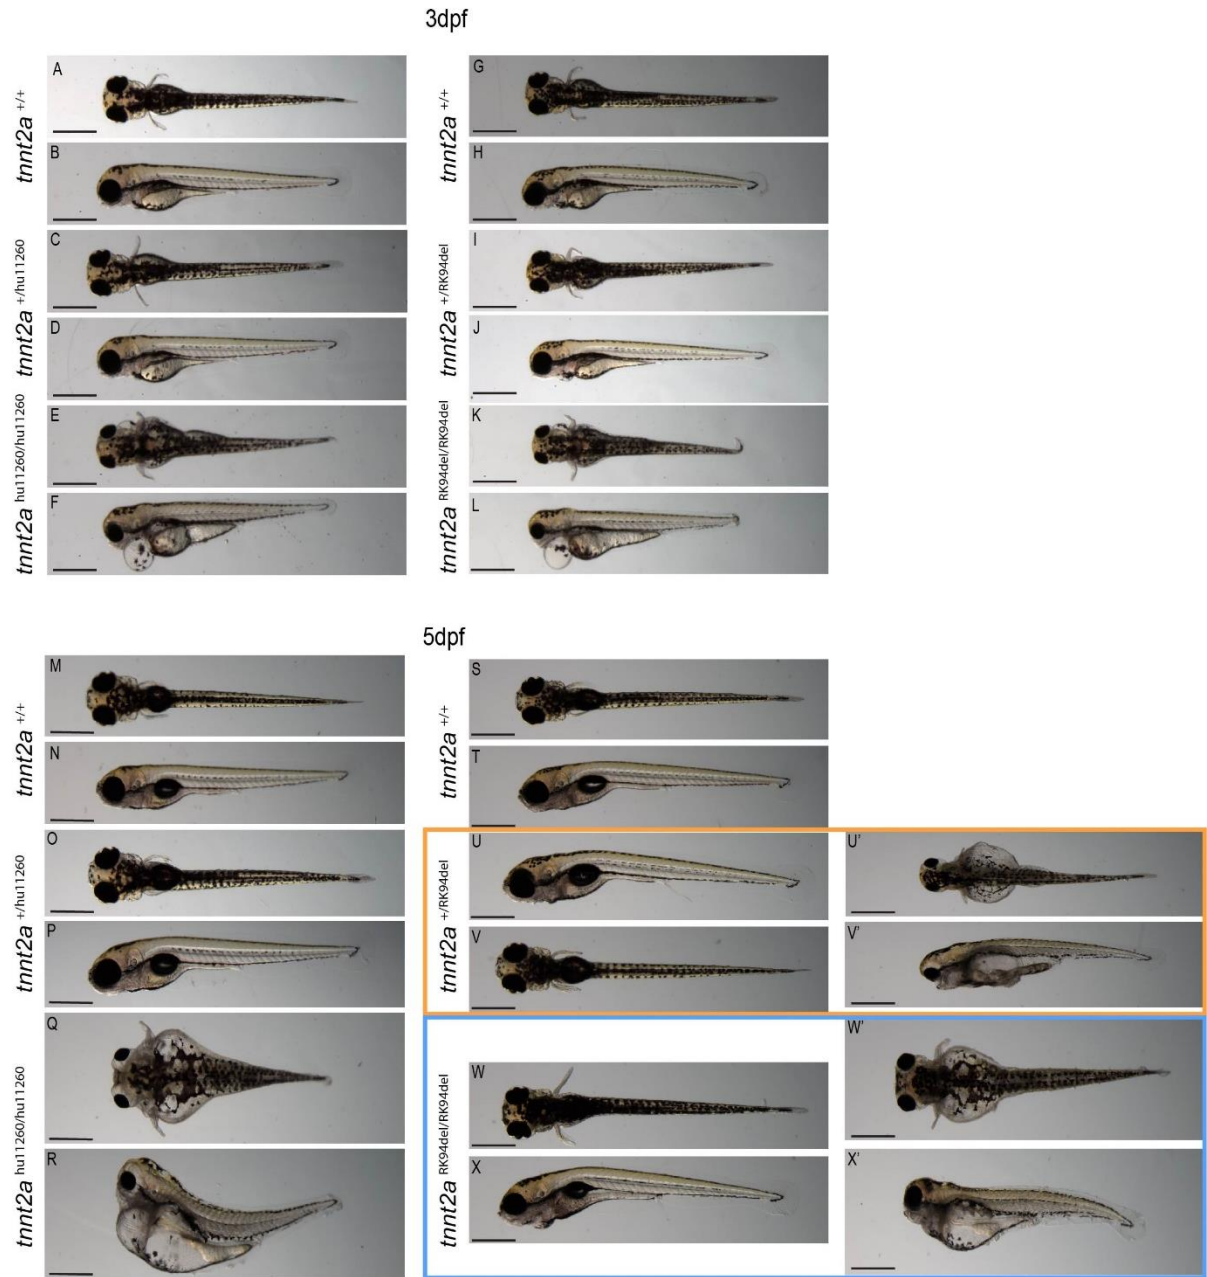

**Supplementary Figure 3: Representative embryonic pictures of the different genotypes at 3 dpf and 5 dpf embryos. (A-F)** Images of *tnnt2a*<sup>+/+</sup>, *tnnt2a*<sup>+/hu11260</sup>, *tnnt2a*<sup>hu11260/hu11260</sup> at 3 dpf. **(G-L)** Images of *tnnt2a*<sup>+/+</sup>, *tnnt2a*<sup>+/RK94del</sup>, *tnnt2a*<sup>RK94del/RK94del</sup> at 3 dpf. **(M-R)** Images of *tnnt2a*<sup>+/+</sup>, *tnnt2a*<sup>+/hu11260</sup>, *tnnt2a*<sup>hu11260/hu11260</sup> at 5 dpf. **(S-X)** Images of *tnnt2a*<sup>+/+</sup>, *tnnt2a*<sup>+/RK94del</sup>, *tnnt2a*<sup>RK94del/RK94del</sup> at 5 dpf. **(U',V',W',X')** Representative images of the phenotype variations of *tnnt2a*<sup>+/RK94del</sup> and *tnnt2a*<sup>RK94del/RK94del</sup> at 5 dpf. Scale bar: 100  $\mu$ m.
